# Supplementary material for: Evaluation of Patient Experiences with PocDoc, a Web-Based Eye Screening Tool
Source: Springer Nature journal article supplement (doi:10.1007/s40123-024-00948-5), 2024-05-06
Supplement: MOESM1 [file 27061068]

## **Supplementary Materials**

### **Evaluation of Patient Experiences with PocDoc, a Web-Based Eye Screening Tool**

Daniel Chin<sup>1\*</sup>, Joewee Boon<sup>1\*</sup>, William Rojas-Carabali<sup>1,2</sup>, Shannon Choo<sup>1</sup>, Carlos Cifuentes-González<sup>1</sup>, Rupesh Agrawal<sup>1-5</sup>

<sup>1</sup>National Healthcare Group Eye Institute, Tan Tock Seng Hospital, Singapore

<sup>2</sup>Lee Kong Chian School of Medicine, Nanyang Technological University, Singapore

<sup>3</sup>Singapore Eye Research Institute, Singapore

<sup>4</sup>Duke NUS Medical School, Singapore

<sup>5</sup>Moorfields Eye Hospital, NHUS Foundation Trust, London, UK

#### **Corresponding author:**

A/Prof Rupesh Agrawal

Senior Consultant,

National Healthcare Group Eye Institute,

Tan Tock Seng Hospital,

Singapore 308433

Email: [Rupesh\\_agrawal@ttsh.com.sg](mailto:Rupesh_agrawal@ttsh.com.sg)

\* Joint First Authors

## Appendix

### 1 A. Pre-test questionnaire

| Question                                                                                                       | Strongly disagree | Disagree | Neutral | Agree | Strongly agree |
|----------------------------------------------------------------------------------------------------------------|-------------------|----------|---------|-------|----------------|
| 1. I think that a remote eye monitoring application such as PocDoc will be useful                              |                   |          |         |       |                |
| 2. I think that I would use a remote eye monitoring application such as PocDoc frequently                      |                   |          |         |       |                |
| 3. The idea of a remote eye monitoring application such as PocDoc sounds unnecessarily complex                 |                   |          |         |       |                |
| 4. The idea of a remote eye monitoring application such as PocDoc sounds easy to use                           |                   |          |         |       |                |
| 5. I think that I would need the support of a technical person to be able to use an application such as PocDoc |                   |          |         |       |                |
| 6. I would imagine that most people would learn to use an application such as PocDoc very quickly              |                   |          |         |       |                |

### 1 B. Post-test questionnaire

| Question                                                                                | Strongly disagree | Disagree | Neutral | Agree | Strongly agree |
|-----------------------------------------------------------------------------------------|-------------------|----------|---------|-------|----------------|
| 1. I think that I would like to use PocDoc frequently                                   |                   |          |         |       |                |
| 2. I found PocDoc unnecessarily complex                                                 |                   |          |         |       |                |
| 3. I thought PocDoc was easy to use                                                     |                   |          |         |       |                |
| 4. I think that I would need the support of a technical person to be able to use PocDoc |                   |          |         |       |                |
| 5. I found the various functions in PocDoc were well integrated                         |                   |          |         |       |                |
| 6. I thought there was too much inconsistency in PocDoc                                 |                   |          |         |       |                |
| 7. I would imagine that most people would learn to use PocDoc very quickly              |                   |          |         |       |                |
| 8. I found PocDoc very cumbersome to use                                                |                   |          |         |       |                |
| 9. I felt very confident using PocDoc                                                   |                   |          |         |       |                |
| 10. I needed to learn a lot of things before I could get going with PocDoc              |                   |          |         |       |                |

**Supplementary Table 1. Mean Likert Scale Responses in the Post-Test Survey Stratified by Age Group.**

| Question | Age group  | N   | Mean | SD    | SE     |
|----------|------------|-----|------|-------|--------|
| 1        | 1-19       | 29  | 3.9  | 0.86  | 0.1596 |
|          | 20-59      | 171 | 3.85 | 0.992 | 0.0759 |
|          | 60 onwards | 187 | 3.29 | 1.263 | 0.0924 |
| 2        | 1-19       | 29  | 2.41 | 1.24  | 0.2302 |
|          | 20-59      | 171 | 1.91 | 0.981 | 0.075  |
|          | 60 onwards | 187 | 2.56 | 1.223 | 0.0894 |
| 3        | 1-19       | 29  | 4.14 | 1.06  | 0.1968 |
|          | 20-59      | 171 | 4.27 | 0.796 | 0.0608 |
|          | 60 onwards | 187 | 3.62 | 1.169 | 0.0855 |
| 4        | 1-19       | 29  | 2.31 | 1.198 | 0.2225 |
|          | 20-59      | 171 | 2.23 | 1.2   | 0.0917 |
|          | 60 onwards | 187 | 3.21 | 1.359 | 0.0994 |
| 5        | 1-19       | 29  | 3.72 | 0.96  | 0.1782 |
|          | 20-59      | 171 | 4.04 | 0.789 | 0.0603 |
|          | 60 onwards | 187 | 3.88 | 0.804 | 0.0588 |
| 6        | 1-19       | 29  | 2.28 | 1.066 | 0.1979 |
|          | 20-59      | 171 | 2.01 | 0.898 | 0.0686 |
|          | 60 onwards | 187 | 2.42 | 0.949 | 0.0694 |
| 7        | 1-19       | 29  | 4.07 | 1.033 | 0.1918 |
|          | 20-59      | 171 | 4.23 | 0.738 | 0.0565 |
|          | 60 onwards | 187 | 4.17 | 0.595 | 0.0435 |
| 8        | 1-19       | 29  | 2.62 | 1.293 | 0.2401 |
|          | 20-59      | 171 | 1.99 | 0.933 | 0.0713 |
|          | 60 onwards | 187 | 2.56 | 1.183 | 0.0865 |
| 9        | 1-19       | 29  | 3.97 | 0.944 | 0.1753 |
|          | 20-59      | 171 | 4.04 | 0.877 | 0.0671 |
|          | 60 onwards | 187 | 3.35 | 1.16  | 0.0848 |
| 10       | 1-19       | 29  | 2.34 | 1.01  | 0.1875 |
|          | 20-59      | 171 | 2.16 | 1.113 | 0.0851 |
|          | 60 onwards | 187 | 3.21 | 1.315 | 0.0961 |

One-way ANOVA test was used to calculate the p values.
